# Supplementary material for: Long non-coding RNA PVT1 activates hepatic stellate cells through competitively binding microRNA-152
Source: PubMed Central journal article supplement (PMC5325334; doi:10.18632/oncotarget.11709), 2016-08-30
Supplement: oncotarget-07-62886-s001.pdf [file oncotarget-07-62886-s001.pdf]

# Long non-coding RNA PVT1 activates hepatic stellate cells through competitively binding microRNA-152

## Supporting Material

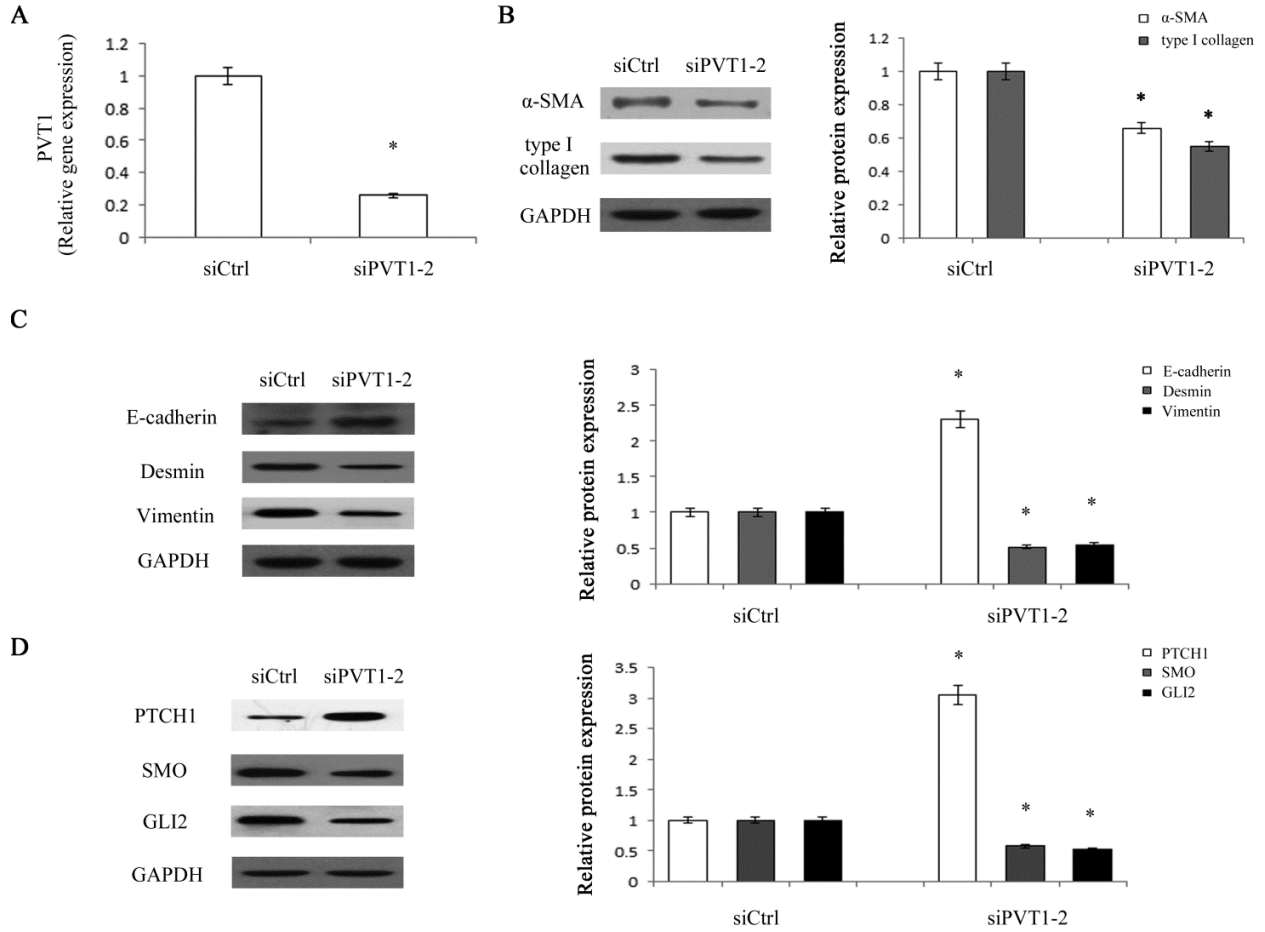

Fig.S1 Effects of siPVT1-2 on HSC activation, EMT process and Hh pathway. (A) PVT1 expression was detected by qRT-PCR in primary HSCs transfected with siPVT1-2. (B) The protein expression levels of  $\alpha$ -SMA and type I collagen were analyzed in primary HSCs transfected with siPVT1-2. (C) The protein levels of E-cadherin, desmin and vimentin were analyzed were analyzed in primary HSCs transfected with siPVT1-2. (D) The protein levels of PTCH1, SMO and GLI2 were analyzed were analyzed in primary HSCs transfected with

siPVT1-2. GAPDH was used as internal control. \* $P < 0.05$  compared to the control. Each value is the mean  $\pm$  SD of three experiments.

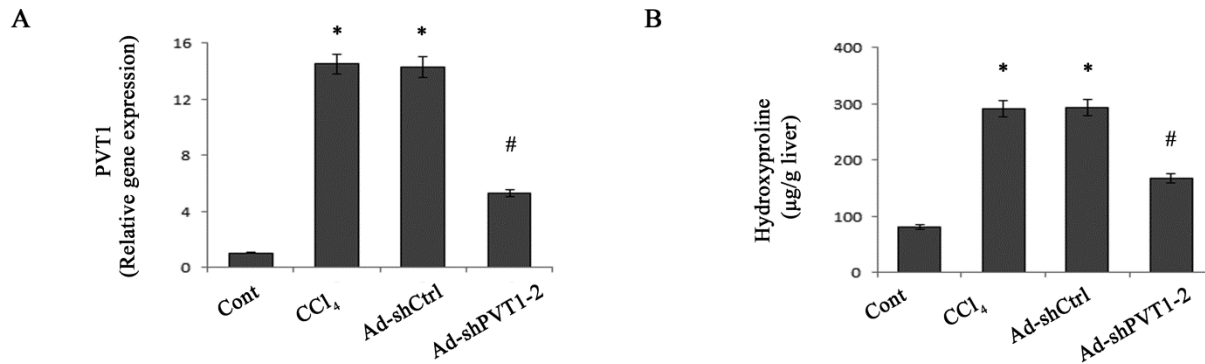

Fig.S2 Silencing PVT1 by Ad-shPVT1-2 inhibits collagen expression in CCl<sub>4</sub> mice. (A) Relative gene expression of PVT1 was analyzed by qRT-PCR. (B) The level of hydroxyproline was detected in CCl<sub>4</sub> mice after Ad-shPVT1-2 treatment. \* $P < 0.05$  compared to the control and # $P < 0.05$  compared to the CCl<sub>4</sub> group. Each value is the mean  $\pm$  SD of three experiments.

**Table.S1 Primer sequences**

| Gene                      | Forward sequence           | Reverse sequence           |
|---------------------------|----------------------------|----------------------------|
| PVT1 transcript variant 1 | 5'-CCTGGATGCCCACTGAAAAC-3' | 5'-GATAGACTGCTTGCCAGGGG-3' |
| PVT1 transcript variant 2 | 5'-GAGCTCCAAGTGGGACTTCT-3' | 5'-GGAGGGCATCTTCTTACCGT-3' |
| PVT1 transcript variant 3 | 5'-CATGCCGGAGGCAATCCTAT-3' | 5'-AAAACCACACTGGAGAGCCG-3' |

**Table.S2 Antibodies used in Western blotting**

| Antigens                                     | Poly/monoclonal | manufacturer                     | Dilution |
|----------------------------------------------|-----------------|----------------------------------|----------|
| GAPDH                                        | Monoclonal      | Abcam,Cambridge, MA (ab8245)     | 1:2000   |
| Type I collagen                              | Monoclonal      | Abcam,Cambridge, MA (ab6308)     | 1:1000   |
| $\alpha$ -SMA                                | Monoclonal      | Abcam,Cambridge, MA (ab7817)     | 1:1000   |
| E-cadherin                                   | Monoclonal      | Abcam,Cambridge, MA (ab76055)    | 1:1500   |
| Desmin                                       | Polyclonal      | Abcam,Cambridge, MA (ab15200)    | 1:1000   |
| Vimentin                                     | Monoclonal      | Abcam,Cambridge, MA (ab8978)     | 1:1500   |
| PTCH1                                        | Polyclonal      | Abcam,Cambridge, MA (ab53715)    | 1:1500   |
| SMO                                          | Polyclonal      | Abcam,Cambridge, MA (ab38686)    | 1:1500   |
| GLI2                                         | Polyclonal      | Abcam,Cambridge, MA (ab26056)    | 1:1500   |
| IRDye800-conjugated<br>rabbit anti-mouse IgG | Polyclonal      | Rockland, Limerick (610-431-002) | 1:2000   |
| IRDye800-conjugated<br>goat anti-rabbit IgG  | Polyclonal      | Rockland, Limerick (611-131-002) | 1:2000   |
